# Supplementary material
Source: MDPI journal article supplement (https://www.mdpi.com/2079-6412/7/10/152)
Supplement: s1 [file s1]

# Supplementary Materials

For dripping test:

Table S1. Average delta  $E$  values for the dripping test, by material.

| Material  | Number of Drops       |                       |                       |                       |                       |
|-----------|-----------------------|-----------------------|-----------------------|-----------------------|-----------------------|
|           | 15                    | 5                     | 1                     | 10                    | 20                    |
| Cotton    | 41.986 ( $\pm 3.44$ ) | 35.454 ( $\pm 5.65$ ) | 25.417 ( $\pm 5.49$ ) | 39.519 ( $\pm 4.16$ ) | 39.830 ( $\pm 4.70$ ) |
| Nylon     | 29.509 ( $\pm 4.01$ ) | 25.347 ( $\pm 3.99$ ) | 12.777 ( $\pm 4.82$ ) | 25.029 ( $\pm 3.94$ ) | 23.820 ( $\pm 3.40$ ) |
| Polyester | 36.184 ( $\pm 3.36$ ) | 34.076 ( $\pm 2.10$ ) | 22.614 ( $\pm 2.67$ ) | 38.845 ( $\pm 2.85$ ) | 37.666 ( $\pm 3.27$ ) |

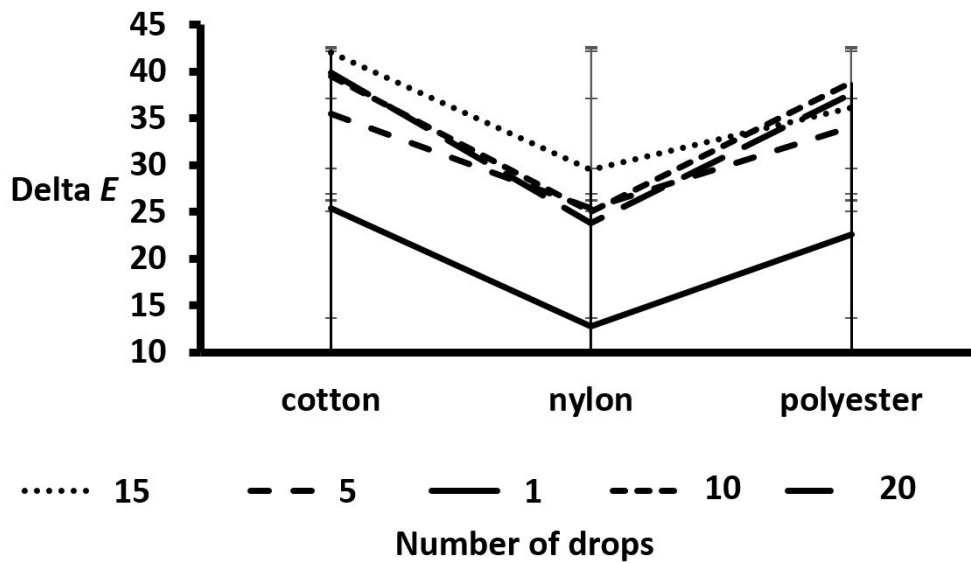

Figure S1. Interaction graph (delta  $E$  values) for number of drops by fabric type.

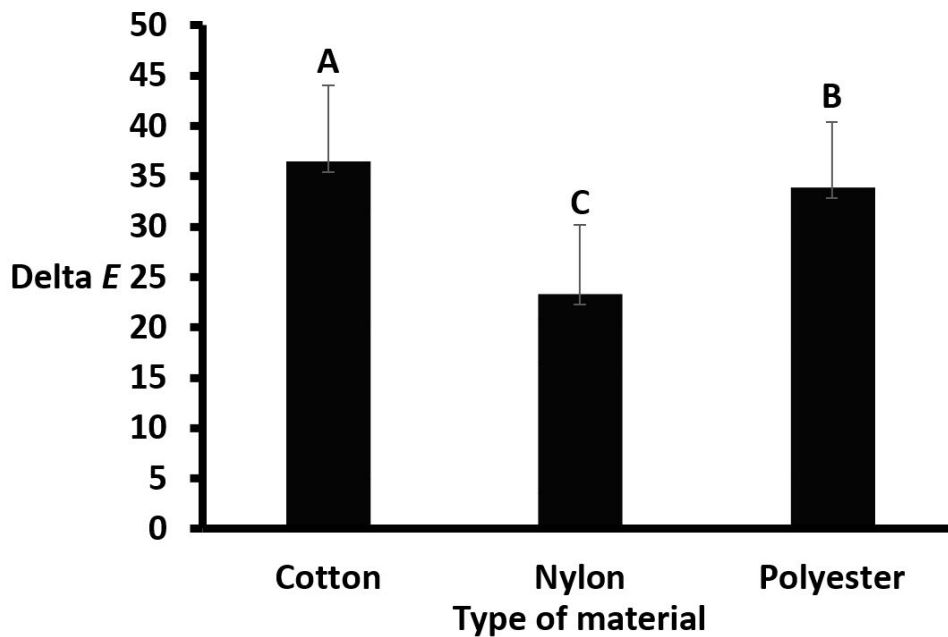

Figure S2. Delta  $E$  values for the dripping test, by fabric. Different letters represent statistical difference at  $\alpha = 0.05$ . The highest delta  $E$  value for polyester was 43.99, the highest for cotton: 44.81, and the highest for nylon: 36.42.

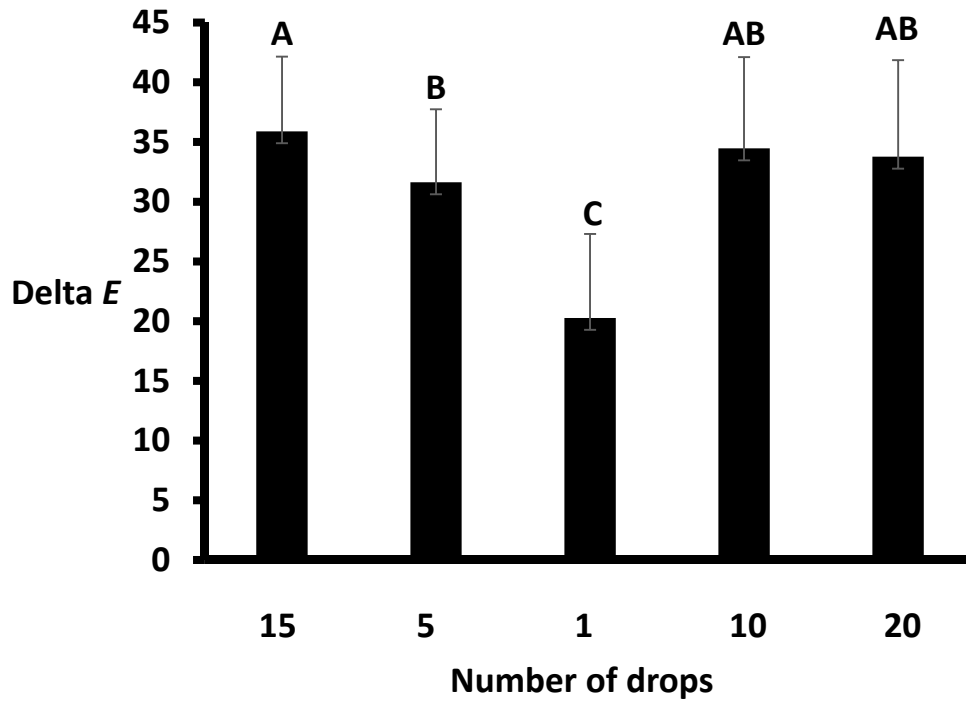

**Figure S3.** Delta  $E$  values by number of drops in the dripping test. Different letters represent statistical difference at  $\alpha = 0.05$ .

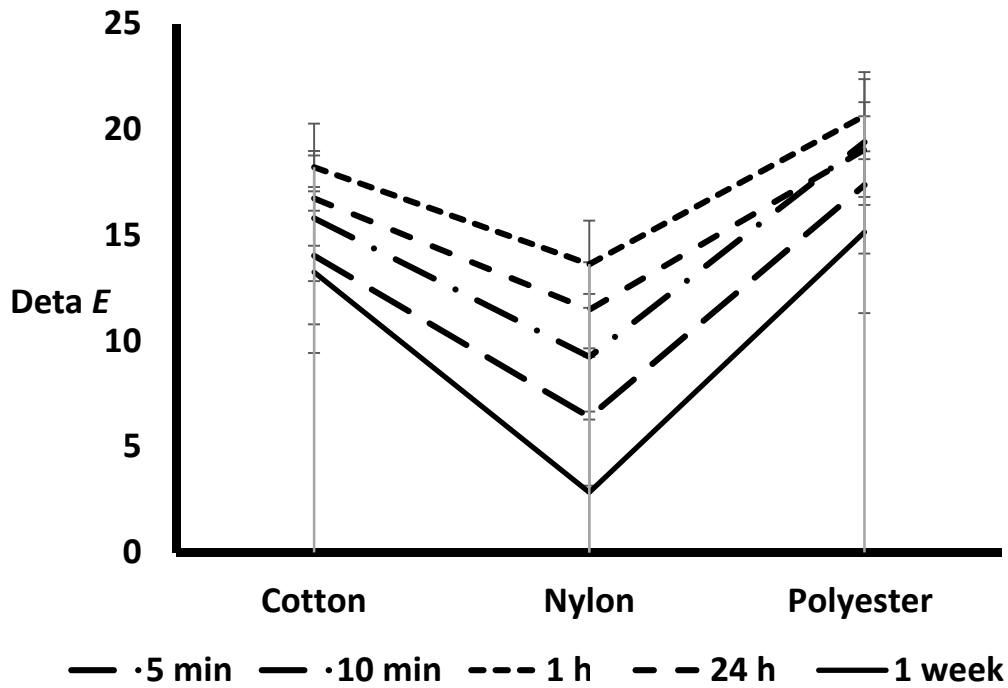

**Figure S4.** An interaction graph showing the delta  $E$  values across fabrics for the submersion test.

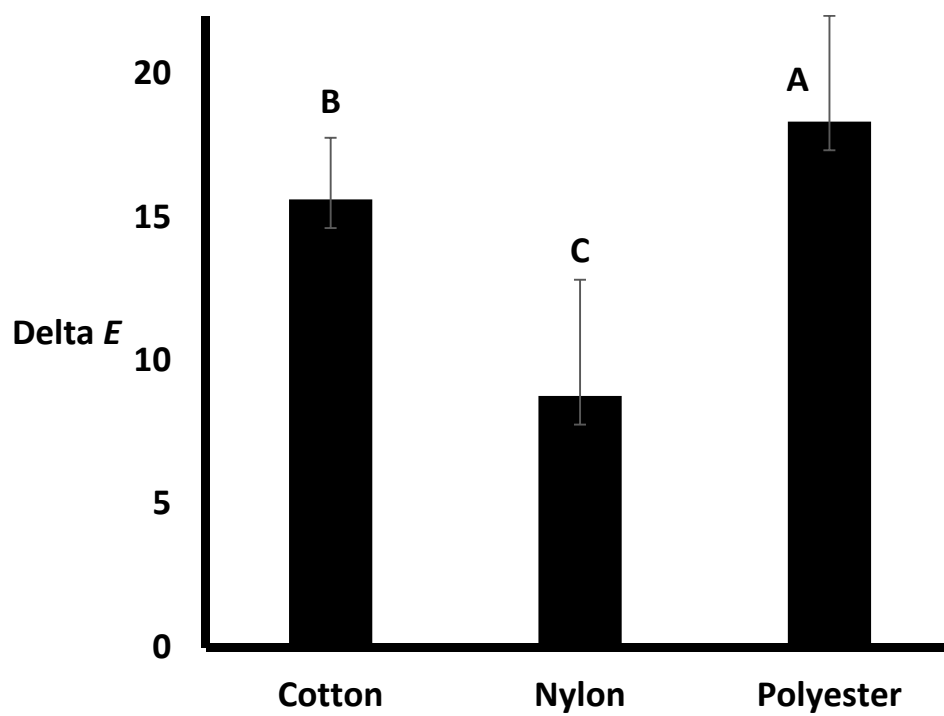

**Figure S5.** Delta  $E$  across fabrics in the submersion test. Different letters represent statistical difference at alpha = 0.05.

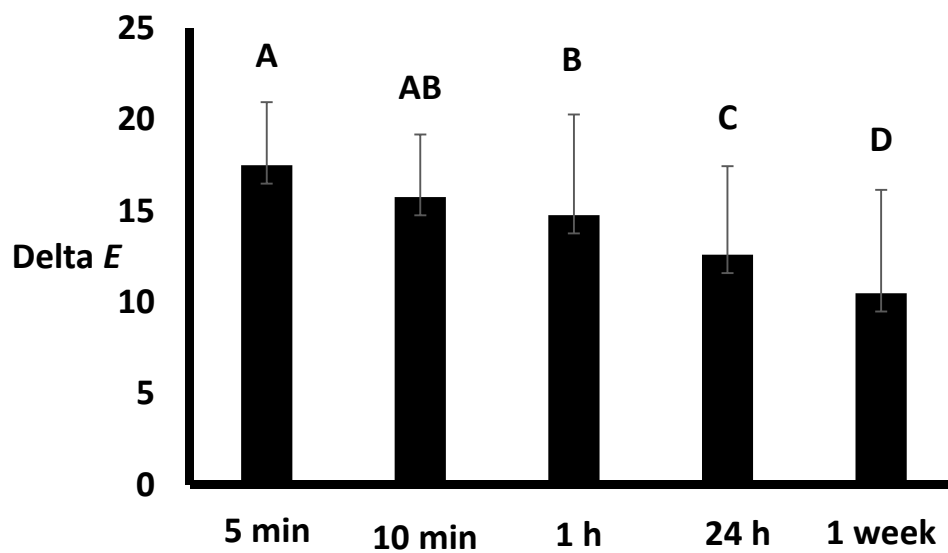

**Figure S6.** Delta  $E$  values by time of reading in the submersion test. Different letters represent statistical difference at alpha = 0.05.

For Saturation test:

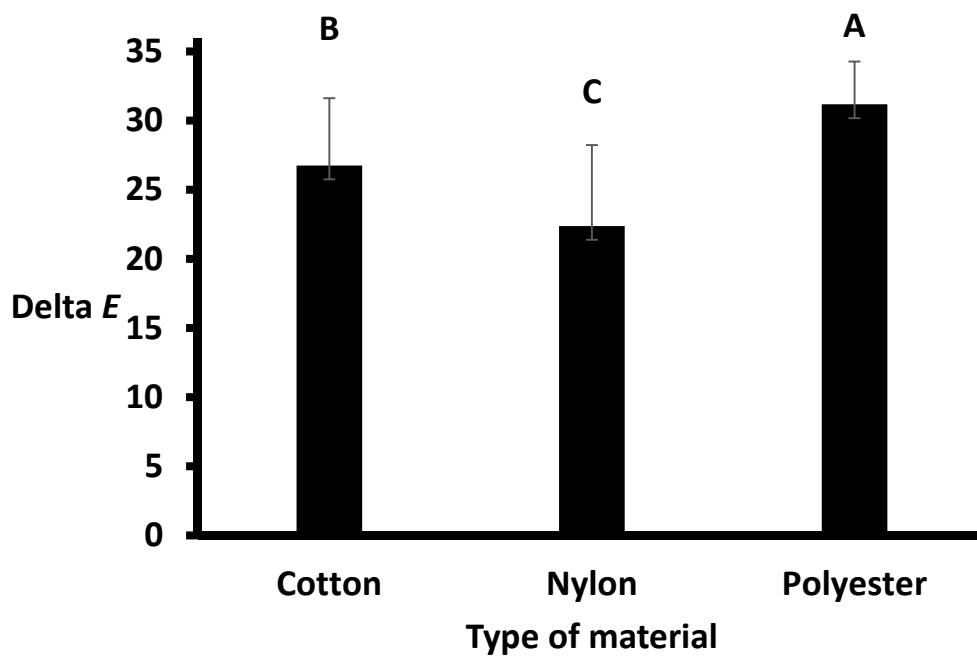

Figure S7. Delta E values by color across polyester, nylon, and cotton in the saturation test. Different letters represent statistical difference at alpha = 0.05.

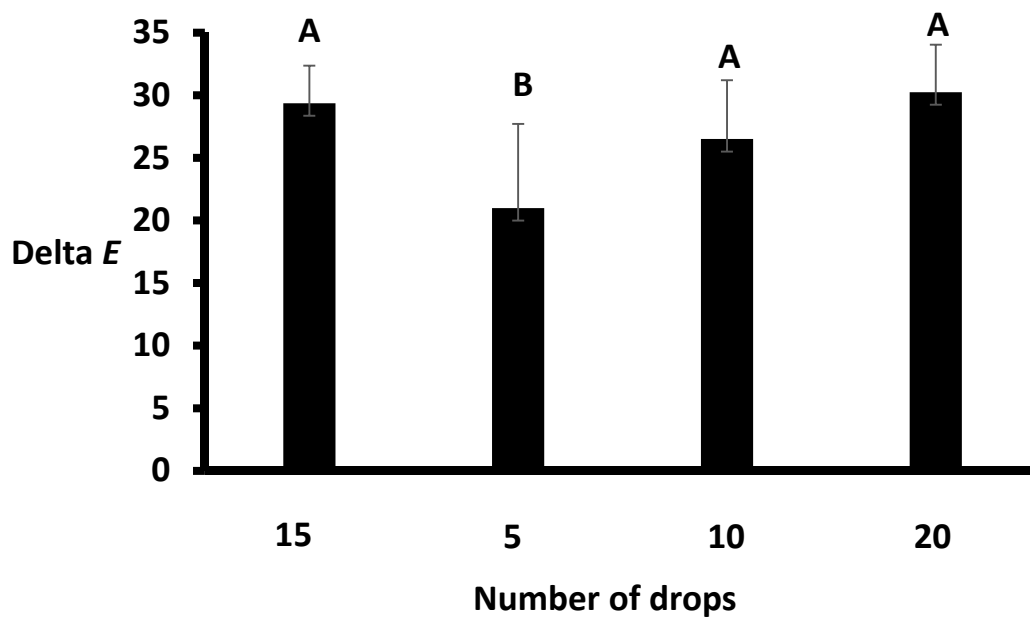

Figure S8. Delta E values by number of drops in the saturation test. Different letters represent statistical difference at alpha = 0.05.

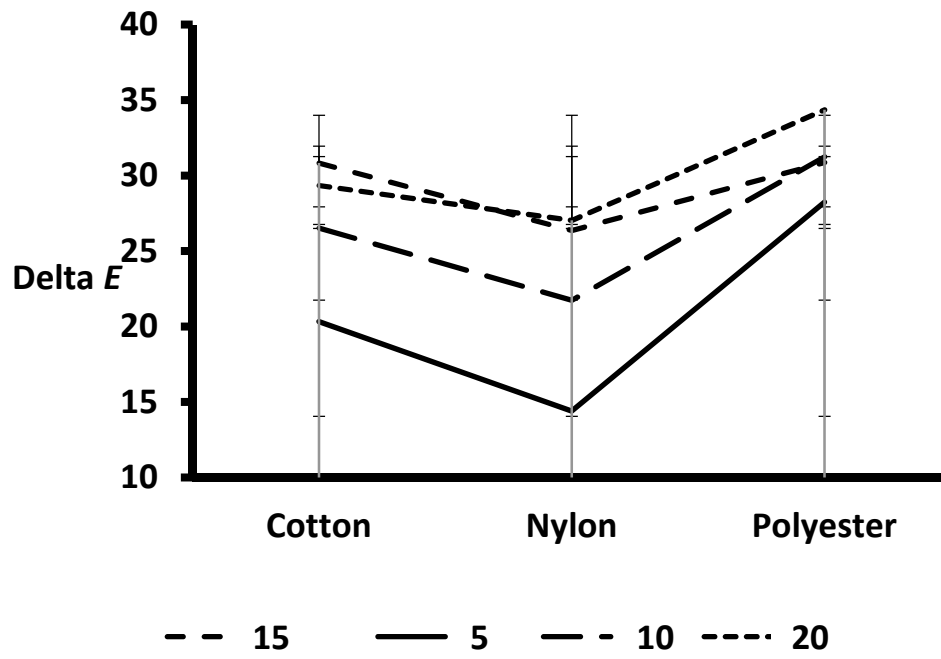

Figure S9. An interaction graph for the delta  $E$  values in the saturation test (number of drops by fabric type).
